# Supplementary material
Source: PubMed Central journal article supplement (PMC4649216)
Supplement: AAC.01472-15_zac012154640so1.pdf [file AAC.01472-15_zac012154640so1.pdf]

## SUPPLEMENTAL MATERIALS

**TABLE S1** *A. baumannii* clinical isolates used in this work

| Strain # | Strain Name                         | Sequenced | Relevant characteristic(s)                 | Source        | Reference |
|----------|-------------------------------------|-----------|--------------------------------------------|---------------|-----------|
| 406      | ATCC 19606 <sup>T</sup>             | *         | Type strain                                | ATCC          | (1)       |
| 1653     | ATCC 19606 <sup>T</sup> t6          |           | ATCC 19606 <sup>T</sup> <i>bauA</i> mutant | Lab stock     | (2)       |
| 3069     | ATCC 19606 <sup>T</sup> <i>entA</i> |           | ATCC 19606 <sup>T</sup> <i>entA</i> mutant | Lab stock     | (2)       |
| 2488     | ATCC 17978                          | *         |                                            | ATCC          | (1)       |
| 2886     | LUH07672                            |           | EU clone III                               | L. Dijkshoorn | (3)       |
| 2887     | LUH08809                            |           | EU clone I                                 | L. Dijkshoorn | (4)       |
| 2888     | LUH05875                            |           | EU clone III                               | L. Dijkshoorn | (5)       |
| 2889     | LUH13000                            |           | EU clone II                                | L. Dijkshoorn |           |
| 2890     | RUH00134                            |           | EU clone II                                | L. Dijkshoorn | (6)       |
| 2891     | RUH00875                            |           | EU clone I                                 | L. Dijkshoorn | (6)       |
| 2997     | AYE                                 | *         |                                            | ATCC          | (7)       |
| 2998     | SDF                                 | *         |                                            | ATCC          | (7)       |
| 3022     | A118                                | *         |                                            | M. Tolmasky   | (8)       |
| 3132     | AB967                               |           |                                            | D. Zurawski   | (9)       |
| 3133     | AB2828                              |           |                                            | D. Zurawski   | (9)       |
| 3134     | AB3340                              |           |                                            | D. Zurawski   | (9)       |
| 3135     | AB3560                              |           |                                            | D. Zurawski   | (9)       |
| 3136     | AB3638                              |           |                                            | D. Zurawski   | (9)       |
| 3137     | AB3785                              |           |                                            | D. Zurawski   | (9)       |
| 3138     | AB3806                              |           |                                            | D. Zurawski   | (9)       |
| 3139     | AB3927                              |           |                                            | D. Zurawski   | (9)       |
| 3140     | AB4025                              |           |                                            | D. Zurawski   | (9)       |
| 3141     | AB4026                              |           |                                            | D. Zurawski   | (9)       |
| 3142     | AB4027                              |           |                                            | D. Zurawski   | (9)       |
| 3143     | AB4052                              |           |                                            | D. Zurawski   | (9)       |
| 3144     | AB4269                              |           |                                            | D. Zurawski   | (9)       |
| 3145     | AB4448                              |           |                                            | D. Zurawski   | (9)       |
| 3146     | AB4456                              |           |                                            | D. Zurawski   | (9)       |
| 3147     | AB4490                              |           |                                            | D. Zurawski   | (9)       |
| 3148     | AB4498                              |           |                                            | D. Zurawski   | (9)       |
| 3149     | AB4795                              |           |                                            | D. Zurawski   | (9)       |
| 3150     | AB4857                              | *         |                                            | D. Zurawski   | (9)       |
| 3151     | AB4878                              |           |                                            | D. Zurawski   | (9)       |
| 3152     | AB4932                              |           |                                            | D. Zurawski   | (9)       |
| 3153     | AB4957                              |           |                                            | D. Zurawski   | (9)       |
| 3154     | AB4991                              |           |                                            | D. Zurawski   | (9)       |
| 3155     | AB5001                              |           |                                            | D. Zurawski   | (9)       |
| 3156     | AB5075                              | *         |                                            | D. Zurawski   | (9)       |
| 3157     | AB5197                              |           |                                            | D. Zurawski   | (9)       |
| 3158     | AB5256                              | *         |                                            | D. Zurawski   | (9)       |
| 3159     | AB5674                              |           |                                            | D. Zurawski   | (9)       |
| 3160     | AB5711                              | *         |                                            | D. Zurawski   | (9)       |
| 3161     | ACICU                               | *         |                                            | D. Zurawski   | (10)      |
| 3284     | AB0057                              | *         |                                            | D. Zurawski   | (11)      |

\* Genome sequence is publically available

**TABLE S2** Automated microdilution MIC screening of Ga-PPIX against *A. baumannii* strains

| Strain # | Strain name             | Bacterial growth determined by OD <sub>600</sub> * |       |       |       |        |       |        |
|----------|-------------------------|----------------------------------------------------|-------|-------|-------|--------|-------|--------|
|          |                         | Ga-PPIX added to the culture medium (µg/ml)        |       |       |       |        |       |        |
|          |                         | 0                                                  | 5     | 10    | 20    | 40     | 80    | 160    |
| 406      | ATCC 19606 <sup>T</sup> | 0.231                                              | 0.264 | 0.240 | 0.248 | -0.002 | 0.006 | 0.003  |
| 2488     | ATCC 17978              | 0.379                                              | 0.424 | 0.420 | 0.444 | 0.005  | 0.011 | 0.006  |
| 2886     | LUH07672                | 0.426                                              | 0.309 | 0.357 | 0.379 | -0.001 | 0.004 | 0.006  |
| 2887     | LUH08809                | 0.493                                              | 0.365 | 0.327 | 0.339 | 0.000  | 0.009 | 0.022  |
| 2888     | LUH05875                | 0.328                                              | 0.263 | 0.321 | 0.329 | 0.014  | 0.010 | 0.004  |
| 2889     | LUH13000                | 0.407                                              | 0.428 | 0.388 | 0.363 | 0.202  | 0.075 | -0.014 |
| 2890     | RUH00134                | 0.341                                              | 0.380 | 0.394 | 0.409 | 0.003  | 0.005 | 0.006  |
| 2891     | RUH00875                | 0.393                                              | 0.476 | 0.520 | 0.623 | 0.109  | 0.012 | 0.012  |
| 2997     | AYE                     | 0.417                                              | 0.499 | 0.522 | 0.575 | 0.115  | 0.003 | 0.009  |
| 2998     | SDF                     | 0.386                                              | 0.297 | 0.252 | 0.224 | 0.004  | 0.013 | 0.016  |
| 3022     | A118                    | 0.313                                              | 0.391 | 0.375 | 0.404 | -0.001 | 0.001 | -0.001 |
| 3132     | AB967                   | 0.439                                              | 0.505 | 0.526 | 0.598 | 0.023  | 0.008 | 0.003  |
| 3133     | AB2828                  | 0.134                                              | 0.160 | 0.161 | 0.169 | 0.002  | 0.006 | 0.006  |
| 3134     | AB3340                  | 0.354                                              | 0.409 | 0.389 | 0.434 | 0.003  | 0.004 | 0.005  |
| 3135     | AB3560                  | 0.362                                              | 0.411 | 0.376 | 0.443 | 0.001  | 0.002 | 0.005  |
| 3136     | AB3638                  | 0.404                                              | 0.425 | 0.508 | 0.516 | 0.000  | 0.003 | 0.007  |
| 3137     | AB3785                  | 0.480                                              | 0.511 | 0.549 | 0.566 | 0.003  | 0.005 | 0.010  |
| 3138     | AB3806                  | 0.368                                              | 0.406 | 0.391 | 0.450 | 0.009  | 0.001 | 0.005  |
| 3139     | AB3927                  | 0.444                                              | 0.512 | 0.508 | 0.471 | 0.001  | 0.003 | 0.005  |
| 3140     | AB4025                  | 0.342                                              | 0.344 | 0.353 | 0.382 | 0.044  | 0.012 | 0.008  |
| 3141     | AB4026                  | 0.382                                              | 0.417 | 0.422 | 0.419 | 0.013  | 0.009 | 0.006  |
| 3142     | AB4027                  | 0.412                                              | 0.371 | 0.249 | 0.272 | 0.023  | 0.006 | 0.035  |
| 3143     | AB4052                  | 0.196                                              | 0.379 | 0.398 | 0.427 | 0.002  | 0.013 | 0.011  |
| 3144     | AB4269                  | 0.389                                              | 0.409 | 0.438 | 0.514 | 0.002  | 0.006 | 0.003  |
| 3145     | AB4448                  | 0.459                                              | 0.556 | 0.529 | 0.622 | 0.011  | 0.020 | 0.018  |
| 3146     | AB4456                  | 0.432                                              | 0.570 | 0.569 | 0.585 | 0.005  | 0.014 | 0.024  |
| 3147     | AB4490                  | 0.328                                              | 0.378 | 0.379 | 0.406 | 0.063  | 0.021 | 0.007  |
| 3148     | AB4498                  | 0.420                                              | 0.473 | 0.473 | 0.497 | 0.001  | 0.016 | 0.007  |
| 3149     | AB4795                  | 0.307                                              | 0.403 | 0.377 | 0.302 | 0.003  | 0.009 | 0.007  |
| 3150     | AB4857                  | 0.496                                              | 0.540 | 0.498 | 0.636 | 0.003  | 0.025 | 0.020  |
| 3151     | AB4878                  | 0.504                                              | 0.530 | 0.550 | 0.624 | 0.010  | 0.023 | 0.023  |
| 3152     | AB4932                  | 0.306                                              | 0.383 | 0.393 | 0.418 | 0.006  | 0.010 | 0.003  |
| 3153     | AB4957                  | 0.475                                              | 0.565 | 0.518 | 0.669 | 0.031  | 0.067 | 0.017  |
| 3154     | AB4991                  | 0.299                                              | 0.344 | 0.348 | 0.398 | 0.004  | 0.004 | 0.003  |
| 3155     | AB5001                  | 0.511                                              | 0.575 | 0.414 | 0.625 | 0.051  | 0.013 | 0.019  |
| 3156     | AB5075                  | 0.467                                              | 0.516 | 0.433 | 0.619 | 0.002  | 0.010 | 0.009  |
| 3157     | AB5197                  | 0.415                                              | 0.498 | 0.473 | 0.526 | 0.008  | 0.019 | 0.007  |
| 3158     | AB5256                  | 0.463                                              | 0.533 | 0.470 | 0.548 | 0.079  | 0.035 | 0.026  |

|      |        |       |       |       |       |       |       |       |
|------|--------|-------|-------|-------|-------|-------|-------|-------|
| 3159 | AB5674 | 0.347 | 0.405 | 0.349 | 0.459 | 0.003 | 0.004 | 0.001 |
| 3160 | AB5711 | 0.254 | 0.261 | 0.156 | 0.312 | 0.021 | 0.013 | 0.021 |
| 3161 | ACICU  | 0.357 | 0.301 | 0.178 | 0.205 | 0.017 | 0.072 | 0.004 |
| 3284 | AB0057 | 0.358 | 0.404 | 0.386 | 0.445 | 0.016 | 0.018 | 0.001 |

---

\*Average of three determinations done in triplicate each time (n=9)

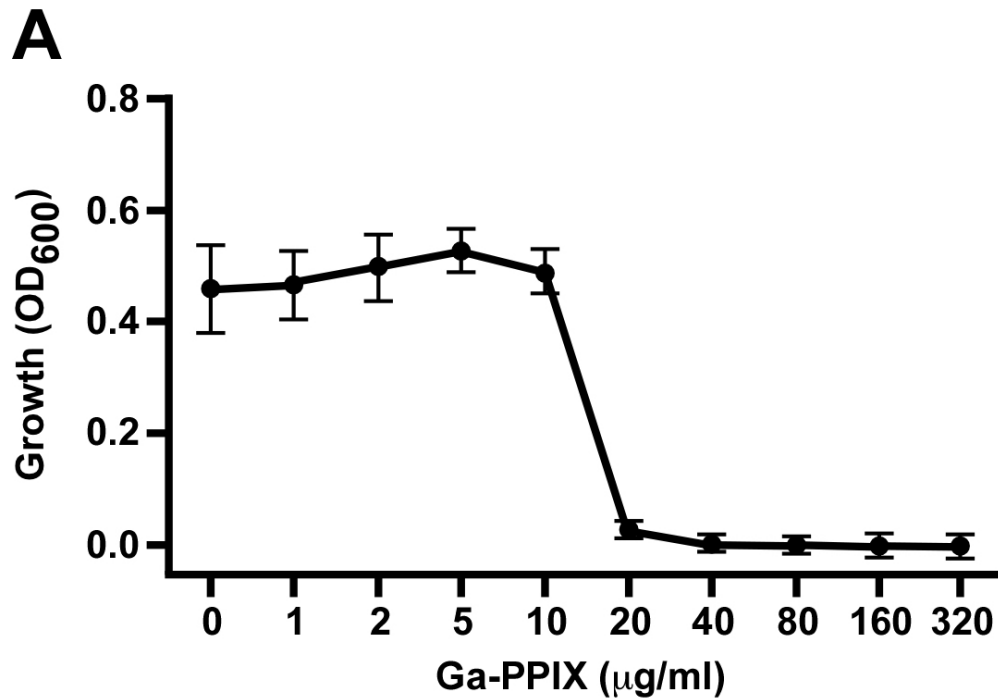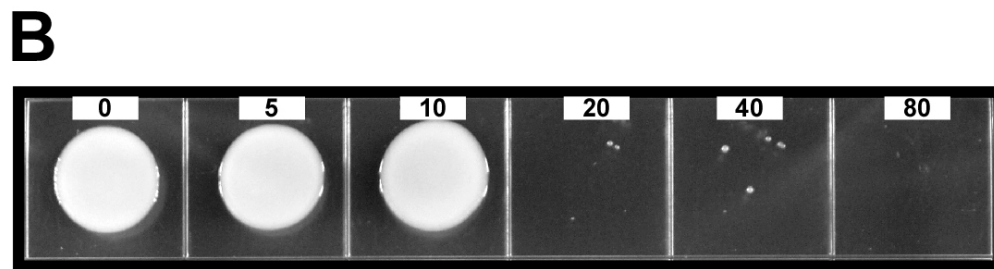

**FIG S1** Susceptibility of *A. baumannii* AB5075 to Ga-PPIX. The MIC of Ga-PPIX was determined by the microdilution method in microtiter plates containing CAMHB inoculated with  $10^5$  AB5075 bacteria following CLSI guidelines (A). (B) MIC cultures were spotted onto MH agar to confirm cell viability.

## REFERENCES

1. **Bouvet PJM, Grimont PAD.** 1986. Taxonomy of the genus *Acinetobacter* with the recognition of *Acinetobacter baumannii* sp. nov., *Acinetobacter haemolyticus* sp. nov., *Acinetobacter johnsonii* sp. nov., and *Acinetobacter junii* sp. nov. and emended descriptions of *Acinetobacter calcoaceticus* and *Acinetobacter lwoffii*. *Int. J. Syst. Bacteriol.* **36**:228-240.
2. **Dorsey CW, Tomaras AP, Connerly PL, Tolmasky ME, Crosa JH, Actis LA.** 2004. The siderophore-mediated iron acquisition systems of *Acinetobacter baumannii* ATCC 19606 and *Vibrio anguillarum* 775 are structurally and functionally related. *Microbiology* **150**:3657-3667.
3. **van den Broek PJ, Arends J, Bernardts AT, De Brauwer E, Mascini EM, van der Reijden TJ, Spanjaard L, Thewessen EA, van der Zee A, van Zeijl JH, Dijkshoorn L.**

2006. Epidemiology of multiple *Acinetobacter* outbreaks in The Netherlands during the period 1999-2001. *Clin. Microbiol. Infect.* **12**:837-843.
4. **van den Broek PJ, van der Reijden TJ, van Strijen E, Helmig-Schurter AV, Bernards AT, Dijkshoorn L.** 2009. Endemic and epidemic acinetobacter species in a university hospital: an 8-year survey. *J. Clin. Microbiol.* **47**:3593-3599.
  5. **van Dessel H, Dijkshoorn L, van der Reijden T, Bakker N, Paauw A, van den Broek P, Verhoef J, Brisse S.** 2004. Identification of a new geographically widespread multiresistant *Acinetobacter baumannii* clone from European hospitals. *Res. Microbiol.* **155**:105-112.
  6. **Dijkshoorn L, Aucken H, Gerner-Smidt P, Janssen P, Kaufmann ME, Garaizar J, Ursing J, Pitt TL.** 1996. Comparison of outbreak and nonoutbreak *Acinetobacter baumannii* strains by genotypic and phenotypic methods. *J. Clin. Microbiol.* **34**:1519-1525.
  7. **Vallenet D, Nordmann P, Barbe V, Poirel L, Mangenot S, Bataille E, Dossat C, Gas S, Kreimeyer A, Lenoble P, Oztas S, Poulain J, Segurens B, Robert C, Abergel C, Claverie JM, Raoult D, Medigue C, Weissenbach J, Cruveiller S.** 2008. Comparative analysis of *Acinetobacters*: three genomes for three lifestyles. *PLoS One* **3**:e1805.
  8. **Ramirez MS, Don M, Merkier AK, Bistue AJ, Zorreguieta A, Centron D, Tolmasky ME.** 2010. Naturally competent *Acinetobacter baumannii* clinical isolate as a convenient model for genetic studies. *J. Clin. Microbiol.* **48**:1488-1490.
  9. **Jacobs AC, Thompson MG, Black CC, Kessler JL, Clark LP, McQueary CN, Gancz HY, Corey BW, Moon JK, Si Y, Owen MT, Hallock JD, Kwak YI, Summers A, Li CZ, Rasko DA, Penwell WF, Honnold CL, Wise MC, Waterman PE, Lesho EP, Stewart RL, Actis LA, Palys TJ, Craft DW, Zurawski DV.** 2014. AB5075, a highly virulent isolate of *Acinetobacter baumannii*, as a model strain for the evaluation of pathogenesis and antimicrobial treatments. *mBio* **5**:e01076-01014.
  10. **Iacono M, Villa L, Fortini D, Bordoni R, Imperi F, Bonnal RJ, Sicheritz-Ponten T, De Bellis G, Visca P, Cassone A, Carattoli A.** 2008. Whole-genome pyrosequencing of an epidemic multidrug-resistant *Acinetobacter baumannii* strain belonging to the European clone II group. *Antimicrob. Agents Chemother.* **52**:2616-2625.
  11. **Adams MD, Goglin K, Molyneaux N, Hujer KM, Lavender H, Jamison JJ, MacDonald IJ, Martin KM, Russo T, Campagnari AA, Hujer AM, Bonomo RA, Gill SR.** 2008. Comparative genome sequence analysis of multidrug-resistant *Acinetobacter baumannii*. *J. Bacteriol.* **190**:8053-8064.
